# Supplementary material for: Melatonin, tunneling nanotubes, mesenchymal cells, and tissue regeneration
Source: PubMed Central journal article supplement — Neural Regen Res. 2022 Sep 16;18(4):760–2. doi: 10.4103/1673-5374.353480 (PMC9700085; doi:10.4103/1673-5374.353480), 2022-09-16
Supplement: NRR-18-760_Suppl2.pdf [file NRR-18-760_Suppl2.pdf]

## OPEN PEER REVIEW REPORT 2

**Name of journal:** Neural Regeneration Research

**Manuscript NO:** NRR-D-22-00464

**Title:** MELATONIN, TUNNELING NANOTUBES, MESENCHYMAL CELLS, AND TISSUE REGENERATION: Current perspective

**Reviewer's Name:** Chengbin Xue

**Reviewer's country:** China

### COMMENTS TO AUTHORS

General Comments:

This manuscript aims to provide a current perspective of melatonin, intercellular mitochondria transfer through tunneling nanotubes for MSCs-based therapy. The topic is attractive for broad readers. The manuscript is well organized. The authors propose the use of melatonin is an important pharmacological strategy to improve MSCs-based cell transplantation. Melatonin has great therapeutic potential in MSCs-based therapy of neurological and immune disorders, cerebral and cardiac ischemia, diabetes, and bone and cartilage diseases. Some suggestions and the detailed weakness are showed as following.

Specific Comments:

1. The graphic of TNT structures may be furnished in the figure to visually illustrate the whole perspective.
2. Limitation of the melatonin application in MSCs-based therapy and TNTs related research should be discussed more in the "Concluding remarks and perspective" section.
